# Supplementary material for: Snowfall in the Himalayas: an uncertain future from a little-known past
Source: Copernicus journal article supplement (doi:10.5194/tc-9-1147-2015), 2015-06-02
Supplement: Supplementary file 1 [file tc-9-1147-2015-supplement.zip]

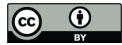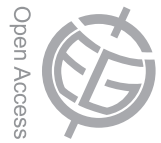

## *Supplement of*

# **Snowfall in the Himalayas: an uncertain future from a little-known past**

**E. Viste and A. Sorteberg**

*Correspondence to:* E. Viste (ellen.viste@uib.no)

- tc-9-1147-2015-supplement-cover-letter.pdf
- Data\_Excel kopi
  - .DS\_Store
  - Bhramaputra
    - \* Data\_Bhramaputra.xls
    - \* Data\_Bhramaputra\_Bhareli.xls
    - \* Data\_Bhramaputra\_Bhramaputra1.xls
    - \* Data\_Bhramaputra\_Bhramaputra2.xls
    - \* Data\_Bhramaputra\_Bhramaputra4.xls
    - \* Data\_Bhramaputra\_Dayang.xls
    - \* Data\_Bhramaputra\_DhansiriChhu.xls
    - \* Data\_Bhramaputra\_Dikho.xls
    - \* Data\_Bhramaputra\_DogxungZangboMaiquZangbo.xls
    - \* Data\_Bhramaputra\_JamunaAtrai.xls
    - \* Data\_Bhramaputra\_JamunaKapili.xls
    - \* Data\_Bhramaputra\_Karatoya.xls
    - \* Data\_Bhramaputra\_Khri.xls
    - \* Data\_Bhramaputra\_LhasaHeRazhengZangbo.xls
    - \* Data\_Bhramaputra\_ManasTrongsaChhu.xls
    - \* Data\_Bhramaputra\_MaquanHe.xls
    - \* Data\_Bhramaputra\_Meghna.xls
    - \* Data\_Bhramaputra\_NyangQu.xls
    - \* Data\_Bhramaputra\_ShangChuYarlungZangboNyang.xls
    - \* Data\_Bhramaputra\_Siyom.xls
    - \* Data\_Bhramaputra\_SubansiriKamlaKhru.xls
    - \* Data\_Bhramaputra\_TistaRanjit.xls
    - \* Data\_Bhramaputra\_TorsaChhuWongChhu.xls
    - \* Data\_Bhramaputra\_YamzhoYumco.xls

- \* Data\_Bhramaputra\_YarlungZangbo.xls
- \* Data\_Bhramaputra\_YarlungZangbo2.xls
- \* Data\_Bhramaputra\_YarlungZangbo3.xls
- \* Data\_Bhramaputra\_Yi'ongZangboParlungZangbo.xls
- \* Data\_Bhramaputra\_ZayaQuLuhitDingbaQu.xls
- Data\_readme.pdf
- Ganges
  - \* Data\_Ganges.xls
  - \* Data\_Ganges\_ARaptiDoon.xls
  - \* Data\_Ganges\_AlaknandaPindar.xls
  - \* Data\_Ganges\_Arun.xls
  - \* Data\_Ganges\_BanasMorel.xls
  - \* Data\_Ganges\_Bansoli.xls
  - \* Data\_Ganges\_Bheri.xls
  - \* Data\_Ganges\_BurhiGandak.xls
  - \* Data\_Ganges\_ChambalSipraParwan.xls
  - \* Data\_Ganges\_Delta.xls
  - \* Data\_Ganges\_EastTons.xls
  - \* Data\_Ganges\_Gambhir.xls
  - \* Data\_Ganges\_Ganga1.xls
  - \* Data\_Ganges\_Ganga2.xls
  - \* Data\_Ganges\_Ganga3.xls
  - \* Data\_Ganges\_Ganga5.xls
  - \* Data\_Ganges\_Ghaghara1.xls
  - \* Data\_Ganges\_Ghaghara2.xls
  - \* Data\_Ganges\_Ghuari.xls
  - \* Data\_Ganges\_Gomati.xls
  - \* Data\_Ganges\_GreatGandak.xls
  - \* Data\_Ganges\_Jamni.xls
  - \* Data\_Ganges\_KaliGandakiSetiMarsyangdi.xls
  - \* Data\_Ganges\_KaliNadi.xls
  - \* Data\_Ganges\_KaliSardaChauka.xls
  - \* Data\_Ganges\_Kanhar.xls
  - \* Data\_Ganges\_KunwariKuno.xls
  - \* Data\_Ganges\_LakhanadiGhuari.xls
  - \* Data\_Ganges\_LittleGandak.xls
  - \* Data\_Ganges\_Morhar.xls
  - \* Data\_Ganges\_NorthKoel.xls
  - \* Data\_Ganges\_PanarKunluiNagar.xls
  - \* Data\_Ganges\_Punpun.xls
  - \* Data\_Ganges\_PurnabhabaNagar.xls
  - \* Data\_Ganges\_Pusur.xls
  - \* Data\_Ganges\_RaimangalMalancha.xls
  - \* Data\_Ganges\_Ramganga.xls
  - \* Data\_Ganges\_Rapti.xls
  - \* Data\_Ganges\_Rihand.xls
  - \* Data\_Ganges\_Sai.xls

- \* Data\_Ganges\_SaptamukhiMatlaGuasuba.xls
- \* Data\_Ganges\_Sengar.xls
- \* Data\_Ganges\_SetiKarnaliMuguKarnali.xls
- \* Data\_Ganges\_SindPahuj.xls
- \* Data\_Ganges\_Son.xls
- \* Data\_Ganges\_Son1.xls
- \* Data\_Ganges\_SonarBearmaKen.xls
- \* Data\_Ganges\_SouthTons.xls
- \* Data\_Ganges\_TambaKosiSunKosi.xls
- \* Data\_Ganges\_Tamur.xls
- \* Data\_Ganges\_Yamuna1.xls
- \* Data\_Ganges\_Yamuna2.xls
- \* Data\_Ganges\_Yamuna3.xls

– Indus

- \* Data\_Indus.xls
- \* Data\_Indus\_Astor.xls
- \* Data\_Indus\_Baran.xls
- \* Data\_Indus\_Bavi.xls
- \* Data\_Indus\_BejiMoradLoralai.xls
- \* Data\_Indus\_Belab.xls
- \* Data\_Indus\_Chawal.xls
- \* Data\_Indus\_Chenab1.xls
- \* Data\_Indus\_Chenab2.xls
- \* Data\_Indus\_Chenab3.xls
- \* Data\_Indus\_Delta.xls
- \* Data\_Indus\_EasternNara2.xls
- \* Data\_Indus\_GilgitHunza.xls
- \* Data\_Indus\_Indus1.xls
- \* Data\_Indus\_Indus3.xls
- \* Data\_Indus\_Indus5.xls
- \* Data\_Indus\_Jhelum.xls
- \* Data\_Indus\_KabulSwatAlingar.xls
- \* Data\_Indus\_Kolachi.xls
- \* Data\_Indus\_KrishenGanga.xls
- \* Data\_Indus\_ManchharLake.xls
- \* Data\_Indus\_Mula.xls
- \* Data\_Indus\_NubraShyok.xls
- \* Data\_Indus\_SangarVehoa.xls
- \* Data\_Indus\_SohanTochiKurram.xls
- \* Data\_Indus\_Sutlej.xls
- \* Data\_Indus\_TerataniChakar.xls
- \* Data\_Indus\_Zaskar.xls
- \* Data\_Indus\_ZhobSiritoiGurnal.xls

• \_\_MACOSX

– Data\_Excel kopi

- \* .\_Data\_readme.pdf

The copyright of individual parts of the supplement might differ from the CC-BY 3.0 licence.
